# Supplementary material
Source: MDPI journal article supplement (https://www.mdpi.com/2311-7524/10/5/440)
Supplement: s1 [file s1]

**Table S3.** Principal Component Analysis in tomato fruit hybrids for different agronomic, physical, organoleptic, and bioactive traits.

|                 | <b>PC1</b>    | <b>PC2</b>    | PC3    | PC4    | PC5    | PC6    |
|-----------------|---------------|---------------|--------|--------|--------|--------|
| Eigenvalue      | <b>5.952</b>  | <b>4.686</b>  | 3.157  | 2.572  | 2.044  | 1.47   |
| Variability (%) | <b>24.802</b> | <b>19.524</b> | 13.153 | 10.715 | 8.517  | 6.123  |
| Cumulative (%)  | <b>24.802</b> | <b>44.326</b> | 57.479 | 68.194 | 76.711 | 82.835 |
| Factor loading  |               |               |        |        |        |        |
| Y               | <b>-0.311</b> | <b>-0.391</b> | 0.638  | 0.160  | -0.101 | -0.105 |
| MFW             | <b>0.669</b>  | <b>-0.420</b> | 0.284  | 0.374  | -0.243 | 0.249  |
| FN              | <b>-0.766</b> | <b>-0.019</b> | 0.234  | -0.025 | 0.206  | -0.227 |
| ED              | <b>0.609</b>  | <b>-0.367</b> | 0.335  | 0.412  | -0.315 | 0.171  |
| LD              | <b>0.158</b>  | <b>-0.105</b> | -0.576 | -0.446 | 0.406  | 0.172  |
| CH              | <b>0.446</b>  | <b>-0.105</b> | -0.200 | -0.608 | 0.103  | -0.122 |
| HUE             | <b>-0.669</b> | <b>0.236</b>  | 0.172  | -0.031 | -0.341 | 0.040  |
| TSS             | <b>-0.194</b> | <b>0.034</b>  | -0.363 | 0.277  | 0.581  | 0.438  |
| TA              | <b>-0.304</b> | <b>0.221</b>  | -0.072 | 0.601  | 0.300  | 0.295  |
| VC              | <b>0.150</b>  | <b>0.480</b>  | -0.502 | 0.248  | 0.189  | -0.438 |
| HC              | <b>0.523</b>  | <b>0.465</b>  | -0.436 | -0.026 | -0.144 | 0.203  |
| FO              | <b>0.467</b>  | <b>0.595</b>  | -0.163 | 0.140  | -0.367 | -0.017 |
| FA              | <b>0.159</b>  | <b>0.630</b>  | 0.289  | -0.599 | -0.261 | 0.033  |
| GLC             | <b>0.366</b>  | <b>0.344</b>  | 0.123  | 0.584  | -0.081 | -0.511 |
| FRT             | <b>0.285</b>  | <b>0.560</b>  | -0.201 | 0.327  | 0.284  | -0.483 |
| LY              | <b>0.161</b>  | <b>0.514</b>  | 0.635  | -0.196 | 0.439  | 0.057  |
| PHF             | <b>0.689</b>  | <b>0.021</b>  | 0.516  | -0.010 | 0.401  | -0.005 |
| CHL             | <b>-0.525</b> | <b>0.709</b>  | 0.139  | 0.229  | -0.080 | 0.283  |
| PHE             | <b>0.844</b>  | <b>0.108</b>  | 0.350  | 0.010  | 0.226  | 0.096  |
| BC              | <b>-0.619</b> | <b>-0.299</b> | 0.278  | -0.191 | 0.111  | -0.336 |
| VIO             | <b>-0.845</b> | <b>0.392</b>  | 0.102  | -0.073 | -0.086 | 0.047  |
| LU              | <b>-0.409</b> | <b>0.779</b>  | 0.009  | 0.235  | -0.087 | 0.220  |
