# Supplementary material
Source: MDPI journal article supplement (https://www.mdpi.com/2311-7524/10/5/440)
Supplement: s1 [file s1]

**Table S1.** Total yield (Y; kg), mean fruit weight (MFW; g), fruit number (FN), longitudinal diameter (LD; mm), equatorial diameter (ED; mm), chroma (CH), hue (HUE), total soluble solids (TSS; °Brix) and titratable acidity (TA; g L<sup>-1</sup>), for the parental lines. Data are mean  $\pm$  SD (n=3).

| Parental Lines | Y              | MFW          | FN           | LD          | ED           | CH         | HUE        | TSS           | TA            |
|----------------|----------------|--------------|--------------|-------------|--------------|------------|------------|---------------|---------------|
| P1             | 10.6 $\pm$ 1.8 | 295 $\pm$ 18 | 40 $\pm$ 6   | 87 $\pm$ 1  | 85 $\pm$ 2   | 26 $\pm$ 6 | 38 $\pm$ 2 | 6.1 $\pm$ 0.6 | 4.1 $\pm$ 0.7 |
| P2             | 9.1 $\pm$ 1.7  | 291 $\pm$ 35 | 24 $\pm$ 3   | 56 $\pm$ 2  | 92 $\pm$ 4   | 23 $\pm$ 5 | 59 $\pm$ 1 | 6.2 $\pm$ 0.2 | 4.8 $\pm$ 0.1 |
| P3             | 9.6 $\pm$ 1.3  | 365 $\pm$ 97 | 26 $\pm$ 5   | 60 $\pm$ 6  | 101 $\pm$ 11 | 27 $\pm$ 4 | 40 $\pm$ 2 | 7.0 $\pm$ 0.6 | 4.4 $\pm$ 0.5 |
| P4             | 10.7 $\pm$ 2.5 | 321 $\pm$ 52 | 30 $\pm$ 4   | 60 $\pm$ 3  | 96 $\pm$ 6   | 33 $\pm$ 1 | 37 $\pm$ 1 | 6.9 $\pm$ 0.6 | 4.4 $\pm$ 0.7 |
| P5             | 7.7 $\pm$ 1.2  | 77 $\pm$ 7   | 104 $\pm$ 11 | 51 $\pm$ 1  | 52 $\pm$ 2   | 24 $\pm$ 1 | 64 $\pm$ 2 | 7.2 $\pm$ 0.2 | 6.2 $\pm$ 0.7 |
| P6             | 8.2 $\pm$ 2.0  | 285 $\pm$ 34 | 24 $\pm$ 4   | 68 $\pm$ 4  | 86 $\pm$ 7   | 30 $\pm$ 1 | 45 $\pm$ 3 | 5.8 $\pm$ 0.2 | 3.5 $\pm$ 0.1 |
| P7             | 9.0 $\pm$ 1.0  | 291 $\pm$ 38 | 27 $\pm$ 2   | 58 $\pm$ 3  | 94 $\pm$ 4   | 36 $\pm$ 1 | 49 $\pm$ 1 | 6.5 $\pm$ 0.2 | 4.7 $\pm$ 0.4 |
| P8             | 15.1 $\pm$ 1.9 | 288 $\pm$ 31 | 90 $\pm$ 26  | 64 $\pm$ 1  | 87 $\pm$ 4   | 34 $\pm$ 2 | 51 $\pm$ 1 | 5.2 $\pm$ 0.1 | 3.0 $\pm$ 0.1 |
| P9             | 11.5 $\pm$ 2.9 | 189 $\pm$ 15 | 62 $\pm$ 11  | 58 $\pm$ 2  | 78 $\pm$ 3   | 38 $\pm$ 1 | 52 $\pm$ 1 | 6.0 $\pm$ 0.6 | 3.4 $\pm$ 0.4 |
| P10            | 13.2 $\pm$ 1.5 | 178 $\pm$ 16 | 80 $\pm$ 9   | 55 $\pm$ 1  | 81 $\pm$ 3   | 42 $\pm$ 1 | 51 $\pm$ 1 | 6.3 $\pm$ 0   | 4.1 $\pm$ 0.2 |
| P11            | 8.9 $\pm$ 1.1  | 341 $\pm$ 35 | 28 $\pm$ 2   | 66 $\pm$ 7  | 98 $\pm$ 3   | 38 $\pm$ 1 | 58 $\pm$ 2 | 5.7 $\pm$ 0.2 | 3.5 $\pm$ 0.3 |
| P12            | 6.0 $\pm$ 1.3  | 113 $\pm$ 6  | 53 $\pm$ 10  | 68 $\pm$ 1  | 56 $\pm$ 3   | 30 $\pm$ 6 | 50 $\pm$ 2 | 7.0 $\pm$ 0.6 | 2.9 $\pm$ 0.3 |
| P13            | 7.6 $\pm$ 1.5  | 194 $\pm$ 8  | 46 $\pm$ 8   | 113 $\pm$ 3 | 59 $\pm$ 2   | 39 $\pm$ 0 | 49 $\pm$ 1 | 6.7 $\pm$ 0.2 | 3.6 $\pm$ 0.3 |
| P14            | 7.9 $\pm$ 0.8  | 179 $\pm$ 28 | 47 $\pm$ 6   | 96 $\pm$ 3  | 60 $\pm$ 6   | 38 $\pm$ 1 | 49 $\pm$ 1 | 6.2 $\pm$ 0.3 | 3.6 $\pm$ 0.3 |
