# Supplementary material
Source: MDPI journal article supplement (https://www.mdpi.com/2311-7524/10/5/440)
Supplement: s1 [file s1 › Figure S1.pdf]

Supplementary Materials

**Figure S1.** Eighteen F1 hybrid combinations obtained using fourteen different parental genotypes.

| First parental                                                                      |   | Second parental                                                                     |   | Hybrid F1                                                                           | First Parental                                                                       |   | Second Parental                                                                       |   | Hybrid F1                                                                             |
|-------------------------------------------------------------------------------------|---|-------------------------------------------------------------------------------------|---|-------------------------------------------------------------------------------------|--------------------------------------------------------------------------------------|---|---------------------------------------------------------------------------------------|---|---------------------------------------------------------------------------------------|
| P3                                                                                  | x | P2                                                                                  | → | H3                                                                                  | P8                                                                                   | x | P7                                                                                    | → | H16                                                                                   |
| 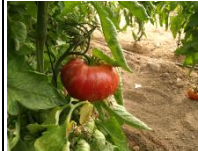   |   | 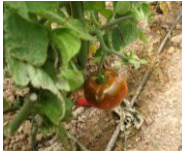   |   | 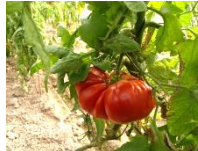   | 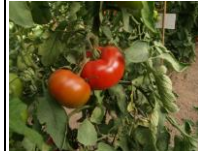   |   | 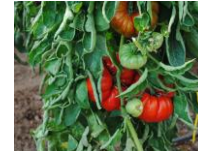   |   | 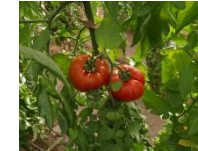   |
| P3                                                                                  | x | P4                                                                                  | → | H4                                                                                  | P9                                                                                   | x | P6                                                                                    | → | H13                                                                                   |
| 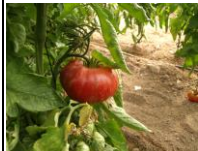   |   | 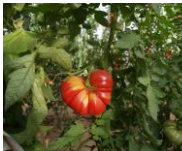   |   | 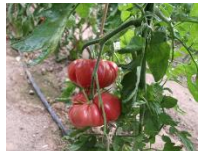   | 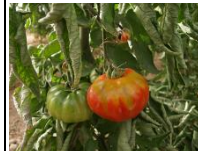   |   | 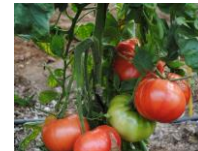   |   | 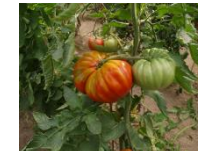   |
| P5                                                                                  | x | P2                                                                                  | → | H5                                                                                  | P9                                                                                   | x | P7                                                                                    | → | H14                                                                                   |
| 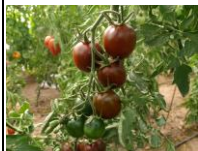   |   | 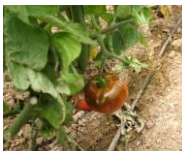   |   | 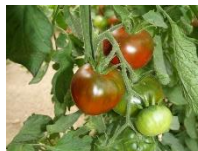   | 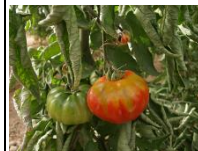   |   | 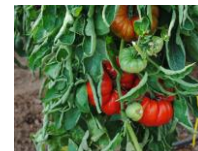   |   | 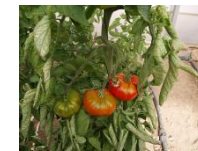   |
| P6                                                                                  | x | P2                                                                                  | → | H6                                                                                  | P9                                                                                   | x | P10                                                                                   | → | H15                                                                                   |
| 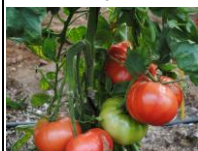  |   | 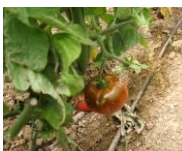  |   | 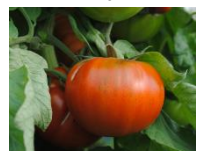  | 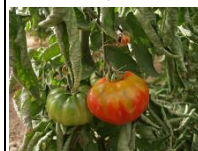  |   | 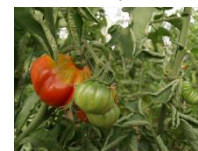  |   | 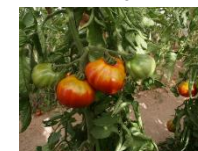  |
| P7                                                                                  | x | P6                                                                                  | → | H7                                                                                  | P9                                                                                   | x | P11                                                                                   | → | H16                                                                                   |
| 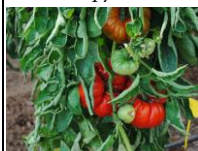 |   | 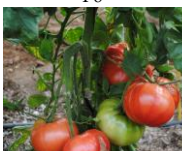 |   | 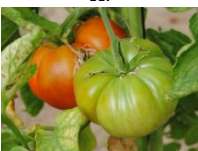 | 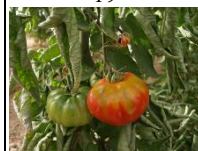 |   | 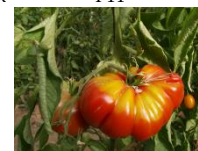 |   | 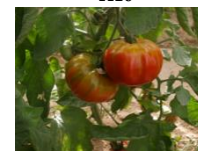 |
| P7                                                                                  | x | P11                                                                                 | → | H8                                                                                  | P12                                                                                  | x | P10                                                                                   | → | H17                                                                                   |
| 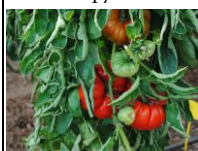 |   | 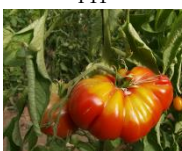 |   | 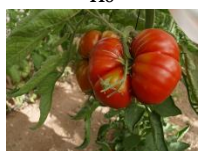 | 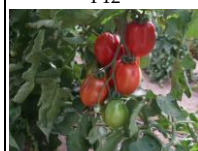 |   | 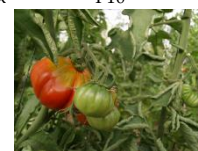 |   | 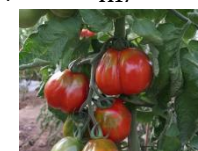 |
| P8                                                                                  | x | P2                                                                                  | → | H9                                                                                  | P12                                                                                  | x | P13                                                                                   | → | H18                                                                                   |
| 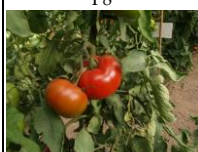 |   | 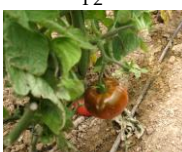 |   | 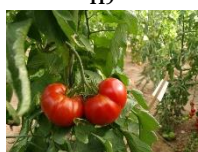 | 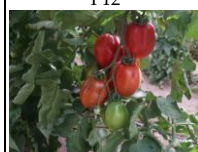 |   | 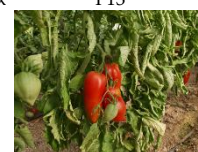 |   | 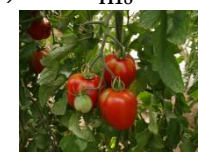 |
| P8                                                                                  | x | P5                                                                                  | → | H10                                                                                 | P13                                                                                  | x | P1                                                                                    | → | H19                                                                                   |
| 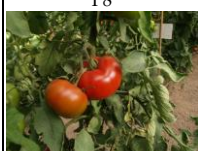 |   | 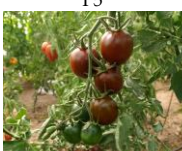 |   | 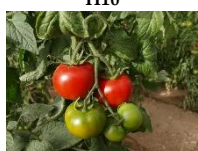 | 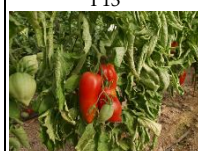 |   | 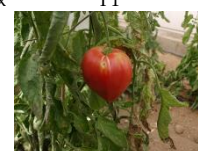 |   | 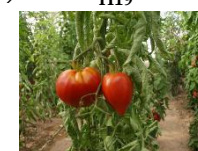 |
| P8                                                                                  | x | P6                                                                                  | → | H11                                                                                 | P13                                                                                  | x | P14                                                                                   | → | H20                                                                                   |
| 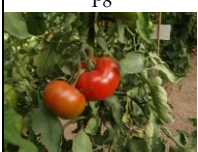 |   | 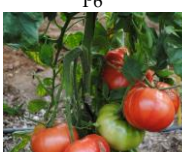 |   | 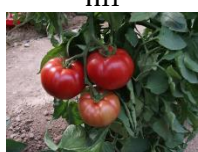 | 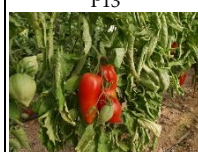 |   | 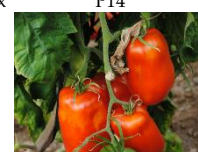 |   | 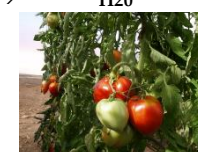 |
