# Supplementary material
Source: MDPI journal article supplement (https://www.mdpi.com/2311-7524/10/5/440)
Supplement: s1 [file s1 › Figure S2.pdf]

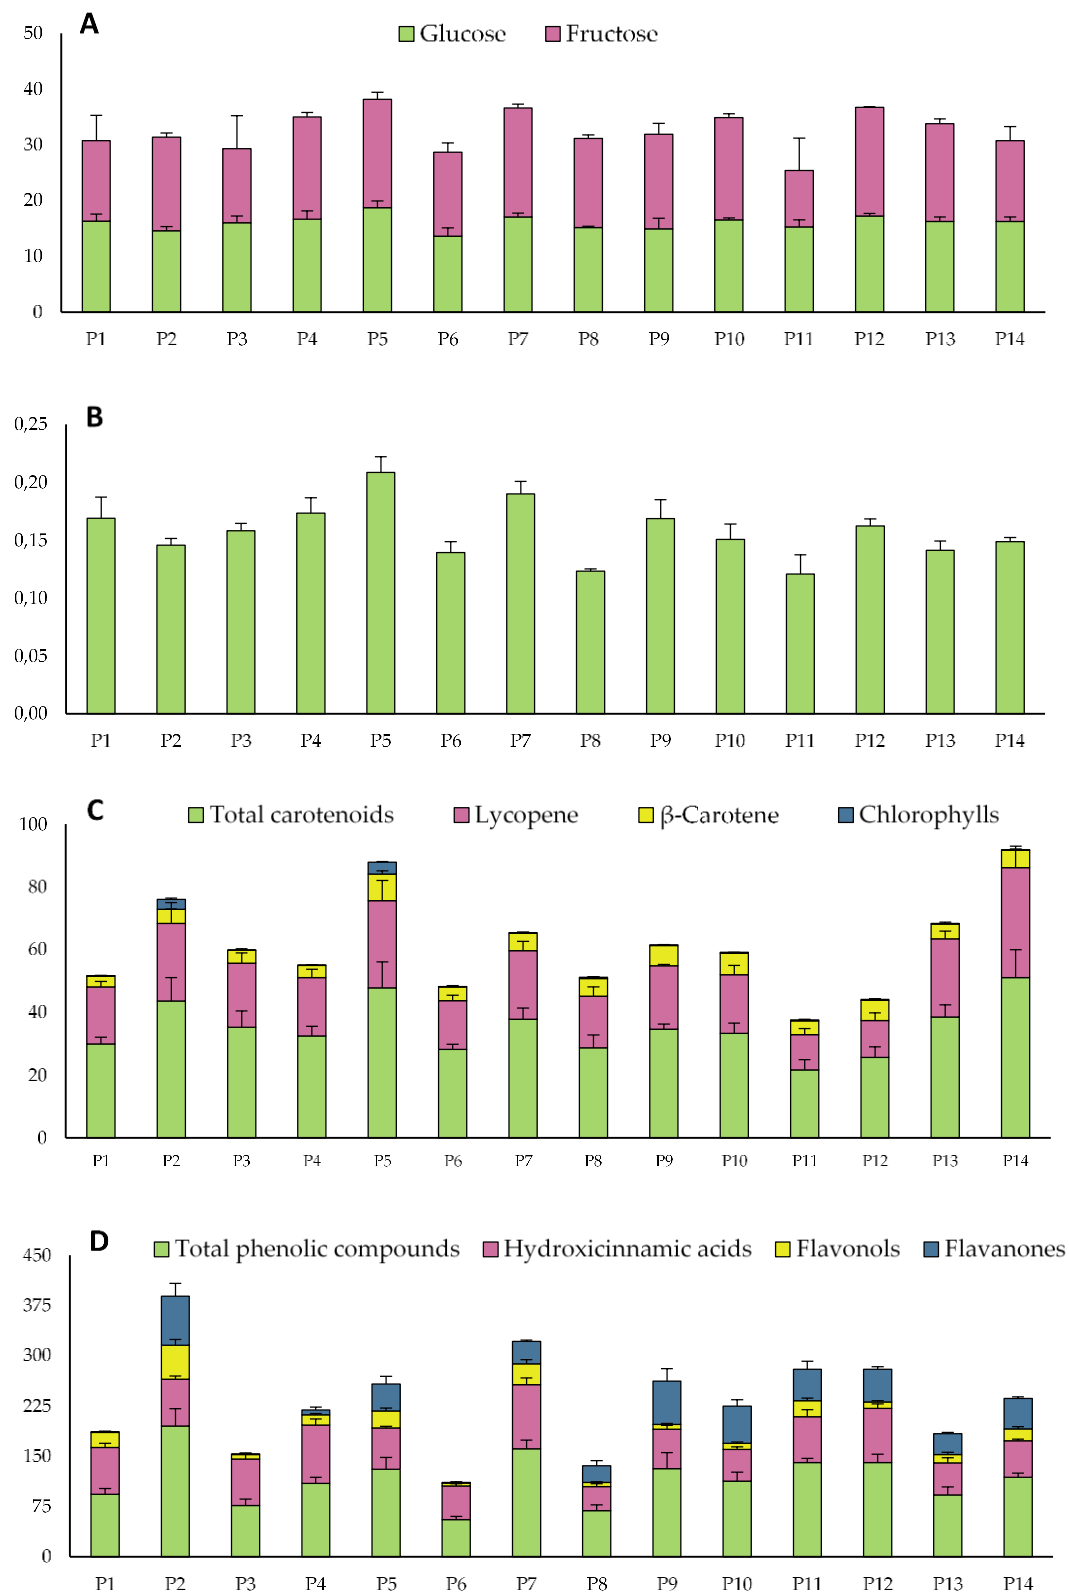

Figure S2. A) Concentration of soluble sugars (mg g<sup>-1</sup>), B) vitamin C (mg g<sup>-1</sup>), C) total carotenoids, lycopene, β-carotene and chlorophylls (μg g<sup>-1</sup>) and D) total phenolic compounds, hydroxycinnamic acids, flavonols and flavanones (μg g<sup>-1</sup>) in traditional parental lines (P1 to P14). The bars represent the mean ± SE (n = 3).
