# Supplementary material
Source: MDPI journal article supplement (https://www.mdpi.com/2311-7524/10/5/440)
Supplement: s1 [file s1 › Table S2.pdf]

**Table S2.** Selection characteristics of tomato traditional parental lines used in the development of F1 hybrids.

| Genotypes          | Type            | Number of Crosses |        | Characteristics                                                                                                                                                           |
|--------------------|-----------------|-------------------|--------|---------------------------------------------------------------------------------------------------------------------------------------------------------------------------|
|                    |                 | Male              | Female |                                                                                                                                                                           |
| BGMU01010600 (P1)  | Corazón de toro | 1                 | -      | <ul style="list-style-type: none"> <li>• Very good taste</li> <li>• Equilibrate flavor</li> </ul>                                                                         |
| BGMU01010922 (P2)  | de la Sierra    | 4                 | -      | <ul style="list-style-type: none"> <li>• Good taste</li> <li>• Chlorophyll content</li> <li>• High phenolic compounds content</li> <li>• High lycopene content</li> </ul> |
| BGMU01010639 (P3)  | Flor de Baladre | 0                 | 2      | <ul style="list-style-type: none"> <li>• Agronomic performance</li> <li>• Good taste</li> </ul>                                                                           |
| BGMU01010640 (P4)  | Flor de Baladre | 1                 | -      | <ul style="list-style-type: none"> <li>• Agronomic performance</li> <li>• Very good taste</li> </ul>                                                                      |
| BGMU01010609 (P5)  | Kumato          | 1                 | 1      | <ul style="list-style-type: none"> <li>• Chlorophyll content</li> <li>• High vitamin C content</li> <li>• High carotenoids content</li> </ul>                             |
| BGMU01010661 (P6)  | Mesa Murciano   | 3                 | 1      | <ul style="list-style-type: none"> <li>• Agronomic performance</li> <li>• Very good taste</li> </ul>                                                                      |
| BGMU01010643 (P7)  | Mesa Murciano   | 2                 | 2      | <ul style="list-style-type: none"> <li>• Very good taste</li> <li>• High lycopene content</li> <li>• High phenolic compounds content</li> </ul>                           |
| BGMU01010675 (P8)  | Mesa Murciano   | -                 | 4      | <ul style="list-style-type: none"> <li>• Agronomic performance</li> <li>• Very good taste</li> </ul>                                                                      |
| BGMU01010646 (P9)  | Muchamiel       |                   | 4      | <ul style="list-style-type: none"> <li>• Agronomic performance</li> <li>• Good taste</li> <li>• High vitamin C content</li> <li>• High lycopene content</li> </ul>        |
| BGMU01010665 (P10) | Muchamiel       | 2                 |        | <ul style="list-style-type: none"> <li>• Agronomic performance</li> <li>• High lycopene content</li> </ul>                                                                |
| BGMU01010672 (P11) | Muchamiel       | 2                 |        | <ul style="list-style-type: none"> <li>• Very good taste</li> <li>• High phenolic compounds content</li> </ul>                                                            |
| BGMU01010683 (P12) | de la Pera      |                   | 2      | <ul style="list-style-type: none"> <li>• Agronomic performance</li> </ul>                                                                                                 |
| BGMU01010602 (P13) | Pimiento        | 1                 | 2      | <ul style="list-style-type: none"> <li>• Agronomic performance</li> <li>• Very good taste</li> </ul>                                                                      |
| BGMU01010633 (P14) | Pimiento        | 1                 | -      | <ul style="list-style-type: none"> <li>• Very good taste</li> <li>• High lycopene content</li> </ul>                                                                      |
